# Supplementary material for: Identification of Maturity-Onset Diabetes of the Young Caused by Mutation in FOXM1 via Whole-Exome Sequencing in Northern China
Source: PubMed Central journal article supplement (PMC7900535; doi:10.3389/fendo.2020.534362), 2021-02-09
Supplement: DataSheet_1.pdf [file DataSheet_1.pdf]

# Identification of maturity onset diabetes of the young caused by mutation in *FOXM1* via whole-exome sequencing in Northern China

Liang Zhong<sup>1,2,3</sup>, Zenyi Zhao<sup>1,2</sup>, Qingshan Hu<sup>1,2</sup>, Yang Li<sup>1,2,3</sup>, Weili Zhao<sup>1,2,3</sup>, Chuang Li<sup>1,2</sup>, Yunqiang Xu<sup>1</sup>, Ruijuan Rong<sup>1,2,3</sup>, Jing Zhang<sup>1,2,3</sup>, Zifeng Zhang<sup>1,2,3</sup>, Nan Li<sup>1,2,3</sup>, Zanchao Liu<sup>1,2,3,\*</sup>,

<sup>1</sup> The Shijiazhuang Second Hospital, Shijiazhuang, Hebei, China

<sup>2</sup> Hebei Provincial Key Laboratory of Basic Medicine for Diabetes, Shijiazhuang, Hebei, China

<sup>3</sup> Shijiazhuang Technology Innovation Center of Precision Medicine for Diabetes, Shijiazhuang, Hebei, China

Supplementary Table 1. Pairwise comparison between diabetic groups

|                            | <i>Group1</i> | <i>Group2</i> | <i>p-Value</i> | <i>Adjusted p value</i> | <i>Significance</i> |
|----------------------------|---------------|---------------|----------------|-------------------------|---------------------|
| <i>Age</i>                 | MODY          | T1DM          | 0.00725823     | 0.0073                  | **                  |
| <i>Age</i>                 | MODY          | T2DM          | 1.49E-06       | 4.50E-06                | ****                |
| <i>Age</i>                 | T1DM          | T2DM          | 0.000194237    | 0.00039                 | ***                 |
| <i>BMI</i>                 | MODY          | T1DM          | 0.2            | 0.22                    | ns                  |
| <i>BMI</i>                 | MODY          | T2DM          | 0.00756331     | 0.023                   | **                  |
| <i>BMI</i>                 | T1DM          | T2DM          | 0.109961397    | 0.22                    | ns                  |
| <i>FPG</i>                 | MODY          | T1DM          | 0.406344451    | 0.41                    | ns                  |
| <i>FPG</i>                 | MODY          | T2DM          | 0.00868066     | 0.017                   | **                  |
| <i>FPG</i>                 | T1DM          | T2DM          | 0.001240885    | 0.0037                  | **                  |
| <i>FPGC-peptide</i>        | MODY          | T1DM          | 0.574835652    | 0.57                    | ns                  |
| <i>FPGC-peptide</i>        | MODY          | T2DM          | 0.000220456    | 0.00044                 | ****                |
| <i>FPGC-peptide</i>        | T1DM          | T2DM          | 1.28E-05       | 3.90E-05                | ****                |
| <i>HbA1c</i>               | MODY          | T1DM          | 0.06022889     | 0.12                    | ns                  |
| <i>HbA1c</i>               | MODY          | T2DM          | 0.000239988    | 0.00072                 | ****                |
| <i>HbA1c</i>               | T1DM          | T2DM          | 0.688947849    | 0.69                    | ns                  |
| <i>Insulin</i>             | MODY          | T1DM          | 0.969851098    | 0.97                    | ns                  |
| <i>Insulin</i>             | MODY          | T2DM          | 0.063225047    | 0.13                    | ns                  |
| <i>Insulin</i>             | T1DM          | T2DM          | 0.002002185    | 0.006                   | **                  |
| <i>Hepatic Fat Content</i> | T1DM          | T2DM          | 0.203          | 0.2                     | ns                  |
| <i>Cholesterol</i>         | MODY          | T1DM          | 0.49214177     | 0.98                    | ns                  |
| <i>Cholesterol</i>         | MODY          | T2DM          | 0.216746626    | 0.65                    | ns                  |
| <i>Cholesterol</i>         | T1DM          | T2DM          | 0.981847741    | 0.98                    | ns                  |
| <i>Serum creatinine</i>    | MODY          | T1DM          | 0.53932819     | 1                       | ns                  |
| <i>Serum creatinine</i>    | MODY          | T2DM          | 0.918421945    | 1                       | ns                  |
| <i>Serum creatinine</i>    | T1DM          | T2DM          | 0.23998686     | 0.72                    | ns                  |
| <i>Triglyceride</i>        | MODY          | T1DM          | 0.197685565    | 0.4                     | ns                  |
| <i>Triglyceride</i>        | MODY          | T2DM          | 0.683405314    | 0.68                    | ns                  |
| <i>Triglyceride</i>        | T1DM          | T2DM          | 0.062083274    | 0.19                    | ns                  |
| <i>HDL</i>                 | MODY          | T1DM          | 0.920108282    | 1                       | ns                  |
| <i>HDL</i>                 | MODY          | T2DM          | 0.666186795    | 1                       | ns                  |
| <i>HDL</i>                 | T1DM          | T2DM          | 0.897402908    | 1                       | ns                  |
| <i>LDL</i>                 | MODY          | T1DM          | 0.569700822    | 1                       | ns                  |
| <i>LDL</i>                 | MODY          | T2DM          | 0.304233578    | 0.91                    | ns                  |
| <i>LDL</i>                 | T1DM          | T2DM          | 0.755838935    | 1                       | ns                  |

<sup>1</sup> The pairwise comparison was performed by Wilcoxon test. The P value was adjusted by Benjamini & Hochberg(FDR) method.

<sup>2</sup> 'ns': p > 0.05 ; '\*': p <= 0.05 ; '\*\*': p <= 0.01 ; '\*\*\*': p <= 0.001 ; '\*\*\*\*': p <= 0.0001

**Supplementary Table 2.** Variation count in 14 type MODY gene

|                | D620 | D855 | D884 | D913 | D1103 | D1111 | D1112 | D1174 | D1384 | D1389 |
|----------------|------|------|------|------|-------|-------|-------|-------|-------|-------|
| <i>Hnf4A</i>   | 9    | 16   | 18   | 3    | 8     | 12    | 2     | 2     | 16    | 3     |
| <i>Gck</i>     | 12   | 10   | 10   | 5    | 1     | 5     | 5     | 10    | 10    | 5     |
| <i>Hnf1A</i>   | 9    | 18   | 17   | 20   | 22    | 22    | 20    | 21    | 24    | 21    |
| <i>Pdx1</i>    | 0    | 0    | 1    | 0    | 2     | 3     | 1     | 0     | 0     | 1     |
| <i>Hnf1B</i>   | 0    | 0    | 0    | 1    | 0     | 3     | 2     | 0     | 2     | 0     |
| <i>Neurod1</i> | 1    | 1    | 1    | 1    | 1     | 1     | 1     | 1     | 1     | 1     |
| <i>Klf11</i>   | 1    | 1    | 2    | 2    | 1     | 1     | 2     | 1     | 2     | 1     |
| <i>Cel</i>     | 0    | 1    | 1    | 1    | 0     | 2     | 1     | 1     | 1     | 1     |
| <i>Pax4</i>    | 5    | 0    | 0    | 8    | 0     | 5     | 0     | 4     | 7     | 5     |
| <i>Ins</i>     | 5    | 5    | 3    | 3    | 6     | 6     | 6     | 5     | 6     | 6     |
| <i>Blk</i>     | 20   | 16   | 20   | 17   | 27    | 18    | 18    | 33    | 23    | 21    |
| <i>Abcc8</i>   | 17   | 19   | 25   | 14   | 18    | 16    | 13    | 14    | 21    | 20    |
| <i>Kcjn11</i>  | 0    | 0    | 0    | 0    | 0     | 0     | 0     | 0     | 0     | 0     |
| <i>Appl1</i>   | 3    | 2    | 6    | 2    | 6     | 6     | 5     | 2     | 4     | 5     |

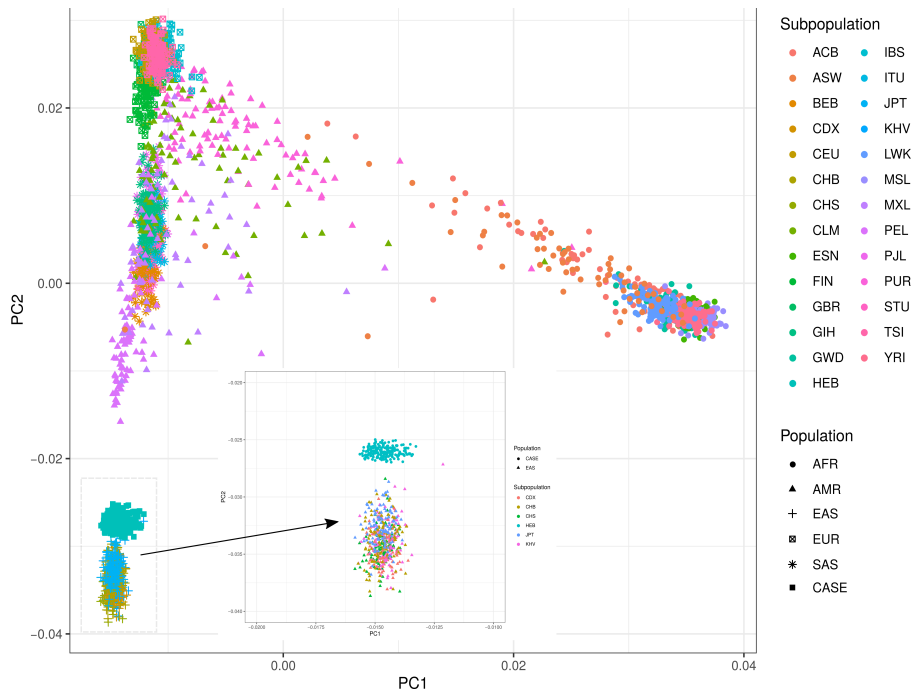

**Supplementary Figure 1.** PCA plot 200 subjects and 1000 Genome Project. The combined PCA analysis of 200 subjects and all samples from 1000 Genome Project. The main population (AFR: African; AMR: American; EAS: East Asian; EUR: European; SAS: South Asian) and 200 diabetic subjects (CASE) were grouped by different shapes. 27 Sub-populations were grouped by different colors. The detailed PCA analysis of EAS samples and the 200 subjects was also displayed in the bottom of the figure.

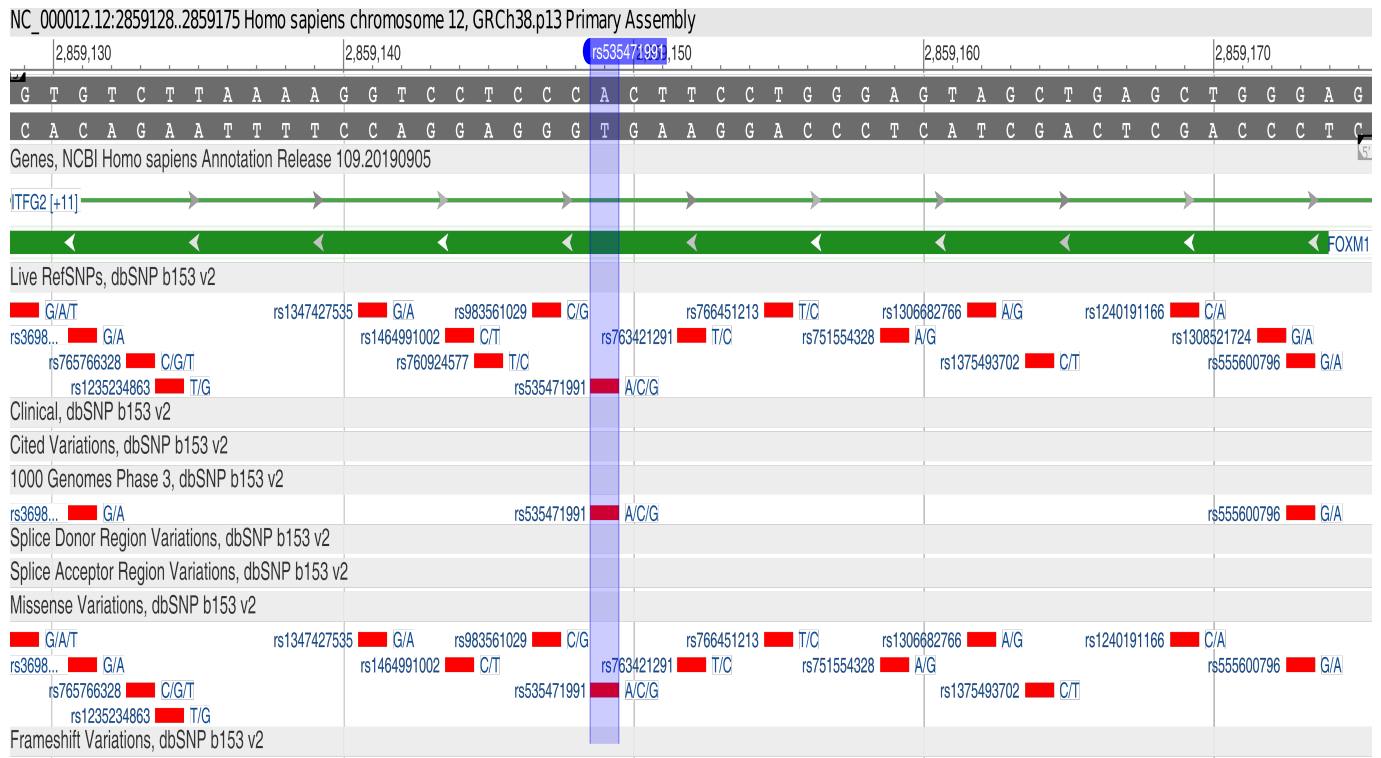

**Supplementary Figure 2.** rs535471991 annotated in variation databases The genomic information and the variation annotation from various databases of rs535471991.
