# Supplementary material for: Identification of Maturity-Onset Diabetes of the Young Caused by Mutation in FOXM1 via Whole-Exome Sequencing in Northern China
Source: Front Endocrinol (Lausanne). 2021 Feb 9;11:534362. doi: 10.3389/fendo.2020.534362 (PMC7900535; doi:10.3389/fendo.2020.534362)
Supplement: Supplementary file 4 [file Table_3.xls]

## Sheet: kegg
	KEGGID	Pvalue	OddsRatio	ExpCount	Count	Size	Term	Symbols
1	5332	0.00211041	8.29261	0.551883	4	41	Graft-versus-host disease	GZMB;HLA-A;HLA-DPB1;KIR2DL1
2	1040	0.00262184	12.6579	0.282672	3	21	Biosynthesis of unsaturated fatty acids	FADS1;HACD1;FADS2
3	4970	0.00668947	4.58977	1.19799	5	89	Salivary secretion	ADCY2;DMBT1;ITPR1;PRB1;ADCY4
4	4540	0.0070097	4.53498	1.21145	5	90	Gap junction	ADCY2;ITPR1;TUBA3E;ADCY4;TUBB8
5	5330	0.01313	6.68266	0.498041	3	37	Allograft rejection	GZMB;HLA-A;HLA-DPB1
6	5140	0.0156713	4.48784	0.96916	4	72	Leishmaniasis	CR1;FCGR1A;HLA-DPB1;JAK1
7	4145	0.0165632	3.15516	2.05946	6	153	Phagosome	FCGR1A;HLA-A;HLA-DPB1;SEC22B;TUBA3E;TUBB8
8	4940	0.0196909	5.67434	0.578804	3	43	Type I diabetes mellitus	GZMB;HLA-A;HLA-DPB1
9	5320	0.0323655	4.62487	0.699949	3	52	Autoimmune thyroid disease	GZMB;HLA-A;HLA-DPB1
10	5322	0.0356861	2.91882	1.83064	5	136	Systemic lupus erythematosus	ACTN2;FCGR1A;HLA-DPB1;SSB;HIST2H2BF
11	4977	0.0407841	6.80992	0.323053	2	24	Vitamin digestion and absorption	ABCC1;TCN2
12	4912	0.046547	3.13017	1.35952	4	101	GnRH signaling pathway	ADCY2;ITPR1;PLD1;ADCY4
13	4972	0.046547	3.13017	1.35952	4	101	Pancreatic secretion	ADCY2;ITPR1;PRSS1;ADCY4
14	5416	0.0676366	3.37176	0.942239	3	70	Viral myocarditis	HLA-A;HLA-DPB1;MYH9
15	4976	0.069961	3.32159	0.955699	3	71	Bile secretion	ADCY2;SLCO1A2;ADCY4
16	5010	0.073592	2.34735	2.24791	5	167	Alzheimer's disease	ERN1;GRIN2C;ITPR1;NDUFA5;NDUFS3
17	4971	0.0771487	3.17958	0.996081	3	74	Gastric acid secretion	ADCY2;ITPR1;ADCY4
18	4612	0.082115	3.09138	1.023	3	76	Antigen processing and presentation	HLA-A;HLA-DPB1;KIR2DL1
19	4020	0.0892311	2.20695	2.38252	5	177	Calcium signaling pathway	ADCY2;GRIN2C;ITPR1;LHCGR;ADCY4
20	4974	0.0951158	2.89069	1.0903	3	81	Protein digestion and absorption	COL9A3;PRSS1;SLC38A2
21	4514	0.103587	2.34047	1.79025	4	133	Cell adhesion molecules (CAMs)	GLG1;HLA-A;HLA-DPB1;F11R
22	2010	0.117922	3.55473	0.592264	2	44	ABC transporters	ABCC1;ABCC5
23	4810	0.158245	1.81328	2.8671	5	213	Regulation of actin cytoskeleton	ACTN2;FGFR2;MYH9;PTK2;TIAM2
24	920	0.161682	6.17308	0.174987	1	13	Sulfur metabolism	PAPSS1
25	5150	0.168847	2.81157	0.740331	2	55	Staphylococcus aureus infection	FCGR1A;HLA-DPB1
26	230	0.173447	1.9011	2.18061	4	162	Purine metabolism	ADCY2;PAPSS1;ADCY4;POLR2J3
27	5130	0.173654	2.75902	0.753791	2	56	Pathogenic Escherichia coli infection	TUBA3E;TUBB8
28	4114	0.190965	2.05734	1.50758	3	112	Oocyte meiosis	ADCY2;ITPR1;ADCY4
29	4270	0.20478	1.98312	1.56142	3	116	Vascular smooth muscle contraction	ADCY2;ITPR1;ADCY4
30	4670	0.20478	1.98312	1.56142	3	116	Leukocyte transendothelial migration	ACTN2;PTK2;F11R
31	4614	0.206023	4.6266	0.228829	1	17	Renin-angiotensin system	ACE
32	450	0.206023	4.6266	0.228829	1	17	Selenocompound metabolism	PAPSS1
33	670	0.216741	4.3537	0.24229	1	18	One carbon pool by folate	MTHFR
34	100	0.227317	4.11111	0.255751	1	19	Steroid biosynthesis	CYP51A1
35	5016	0.231935	1.67181	2.46328	4	183	Huntington's disease	ITPR1;NDUFA5;NDUFS3;POLR2J3
36	5120	0.232694	2.25266	0.915318	2	68	Epithelial cell signaling in Helicobacter pylori infection	NOD1;F11R
37	592	0.237751	3.89406	0.269211	1	20	alpha-Linolenic acid metabolism	FADS2
38	4720	0.242691	2.18564	0.942239	2	70	Long-term potentiation	GRIN2C;ITPR1
39	5212	0.242691	2.18564	0.942239	2	70	Pancreatic cancer	JAK1;PLD1
40	3018	0.247698	2.15359	0.955699	2	71	RNA degradation	DIS3;CNOT6L
41	4062	0.249507	1.61586	2.54404	4	189	Chemokine signaling pathway	ADCY2;PTK2;TIAM2;ADCY4
42	4360	0.251099	1.77444	1.73641	3	129	Axon guidance	PTK2;RGS3;SRGAP3
43	4710	0.258205	3.52198	0.296132	1	22	Circadian rhythm	PER3
44	532	0.258205	3.52198	0.296132	1	22	Glycosaminoglycan biosynthesis - chondroitin sulfate / dermatan sulfate	DSE
45	4530	0.262023	1.73225	1.77679	3	132	Tight junction	ACTN2;MYH9;F11R
46	4120	0.273011	1.69199	1.81717	3	135	Ubiquitin mediated proteolysis	CUL4A;HERC3;HERC2
47	4650	0.276686	1.67897	1.83064	3	136	Natural killer cell mediated cytotoxicity	GZMB;HLA-A;KIR2DL1
48	4512	0.317797	1.78595	1.14415	2	85	ECM-receptor interaction	TNXB;AGRN
49	4914	0.32277	1.76438	1.15761	2	86	Progesterone-mediated oocyte maturation	ADCY2;ADCY4
50	3020	0.325615	2.63828	0.390356	1	29	RNA polymerase	POLR2J3
51	4640	0.332691	1.72274	1.18453	2	88	Hematopoietic cell lineage	CR1;FCGR1A
52	5310	0.334738	2.54686	0.403817	1	30	Asthma	HLA-DPB1
53	5414	0.342573	1.683	1.21145	2	90	Dilated cardiomyopathy	ADCY2;ADCY4
54	250	0.352619	2.38172	0.430738	1	32	Alanine, aspartate and glutamate metabolism	GPT
55	3410	0.361381	2.30689	0.444198	1	33	Base excision repair	PARP4
56	4666	0.3622	1.6087	1.26529	2	94	Fc gamma R-mediated phagocytosis	FCGR1A;PLD1
57	5020	0.378555	2.17044	0.471119	1	35	Prion diseases	STIP1
58	240	0.38643	1.52443	1.33259	2	99	Pyrimidine metabolism	DTYMK;POLR2J3
59	4130	0.38697	2.10806	0.48458	1	36	SNARE interactions in vesicular transport	SEC22B
60	3030	0.38697	2.10806	0.48458	1	36	DNA replication	MCM3
61	3022	0.38697	2.10806	0.48458	1	36	Basal transcription factors	STON1-GTF2A1L
62	565	0.38697	2.10806	0.48458	1	36	Ether lipid metabolism	PLD1
63	4916	0.396015	1.49311	1.35952	2	101	Melanogenesis	ADCY2;ADCY4
64	600	0.41952	1.89053	0.538422	1	40	Sphingolipid metabolism	SPTLC1
65	5146	0.419678	1.42008	1.42682	2	106	Amoebiasis	ACTN2;PTK2
66	280	0.450363	1.71348	0.592264	1	44	Valine, leucine and isoleucine degradation	BCKDHA
67	3420	0.450363	1.71348	0.592264	1	44	Nucleotide excision repair	CUL4A
68	3050	0.450363	1.71348	0.592264	1	44	Proteasome	PSMC1
69	514	0.465172	1.63675	0.619186	1	46	Other types of O-glycan biosynthesis	POFUT2
70	4672	0.479586	1.56656	0.646107	1	48	Intestinal immune network for IgA production	HLA-DPB1
71	5144	0.500492	1.47179	0.686488	1	51	Malaria	CR1
72	4110	0.500745	1.20673	1.66911	2	124	Cell cycle	MCM3;TFDP2
73	4742	0.507275	1.44268	0.699949	1	52	Taste transduction	ADCY4
74	4510	0.508502	1.12069	2.69211	3	200	Focal adhesion	ACTN2;PTK2;TNXB
75	4144	0.511881	1.11483	2.70557	3	201	Endocytosis	FGFR2;HLA-A;PLD1
76	3040	0.513557	1.17714	1.70949	2	127	Spliceosome	SNRPB2;SLU7
77	5014	0.513966	1.41469	0.713409	1	53	Amyotrophic lateral sclerosis (ALS)	GRIN2C
78	4380	0.51778	1.16759	1.72295	2	128	Osteoclast differentiation	FCGR1A;JAK1
79	5012	0.526156	1.14894	1.74987	2	130	Parkinson's disease	NDUFA5;NDUFS3
80	140	0.533508	1.33683	0.753791	1	56	Steroid hormone biosynthesis	AKR1C3
81	5145	0.534435	1.13087	1.77679	2	132	Toxoplasmosis	HLA-DPB1;JAK1
82	190	0.534435	1.13087	1.77679	2	132	Oxidative phosphorylation	NDUFA5;NDUFS3
83	4621	0.546102	1.28947	0.780712	1	58	NOD-like receptor signaling pathway	NOD1
84	590	0.552273	1.26702	0.794173	1	59	Arachidonic acid metabolism	AKR1C3
85	5131	0.564367	1.22436	0.821094	1	61	Shigellosis	NOD1
86	3013	0.608154	0.983352	2.03254	2	151	RNA transport	RAN;THOC5
87	4610	0.6096	1.07881	0.928778	1	69	Complement and coagulation cascades	CR1
88	3320	0.614917	1.06299	0.942239	1	70	PPAR signaling pathway	FADS2
89	5100	0.614917	1.06299	0.942239	1	70	Bacterial invasion of epithelial cells	PTK2
90	4730	0.614917	1.06299	0.942239	1	70	Long-term depression	ITPR1
91	980	0.620163	1.04762	0.955699	1	71	Metabolism of xenobiotics by cytochrome P450	AKR1C3
92	4520	0.630445	1.01816	0.982621	1	73	Adherens junction	ACTN2
93	5412	0.635482	1.00404	0.996081	1	74	Arrhythmogenic right ventricular cardiomyopathy (ARVC)	ACTN2
94	4370	0.645353	0.976923	1.023	1	76	VEGF signaling pathway	PTK2
95	5200	0.647054	0.905673	4.38814	4	326	Pathways in cancer	FGFR2;JAK1;PLD1;PTK2
96	4070	0.654961	0.951215	1.04992	1	78	Phosphatidylinositol signaling system	ITPR1
97	564	0.664311	0.926809	1.07684	1	80	Glycerophospholipid metabolism	PLD1
98	3008	0.664311	0.926809	1.07684	1	80	Ribosome biogenesis in eukaryotes	RAN
99	5410	0.67787	0.892433	1.11723	1	83	Hypertrophic cardiomyopathy (HCM)	ACE
100	5222	0.686607	0.870879	1.14415	1	85	Small cell lung cancer	PTK2
101	4012	0.69511	0.850328	1.17107	1	87	ErbB signaling pathway	PTK2
102	5215	0.703386	0.830711	1.19799	1	89	Prostate cancer	FGFR2
103	5323	0.711439	0.811966	1.22491	1	91	Rheumatoid arthritis	HLA-DPB1
104	3010	0.711439	0.811966	1.22491	1	91	Ribosome	RPL27A
105	4080	0.716649	0.810164	3.66127	3	272	Neuroactive ligand-receptor interaction	GRIN2C;LHCGR;PRSS1
106	5142	0.75877	0.707867	1.3999	1	104	Chagas disease (American trypanosomiasis)	ACE
107	5160	0.840706	0.545306	1.80371	1	134	Hepatitis C	JAK1
108	4910	0.849305	0.52901	1.85756	1	138	Insulin signaling pathway	TRIP10
109	4310	0.872448	0.485373	2.01908	1	150	Wnt signaling pathway	NKD2
110	4630	0.88102	0.469197	2.08639	1	155	Jak-STAT signaling pathway	JAK1
111	4141	0.896495	0.439806	2.22099	1	165	Protein processing in endoplasmic reticulum	ERN1
112	4740	0.902367	0.55417	5.2227	3	388	Olfactory transduction	OR11H1;OR10G7;OR2L8
113	1100	0.916671	0.675248	15.2104	11	1130	Metabolic pathways	BCKDHA;CYP51A1;DTYMK;GPT;MTHFR;NDUFA5;NDUFS3;PLD1;PAPSS1;SPTLC1;POLR2J3
114	4010	0.975711	0.265197	3.60743	1	268	MAPK signaling pathway	FGFR2
